# Supplementary material for: Explaining neural networks for detection of tropical cyclones and atmospheric rivers in gridded atmospheric simulation data
Source: Copernicus journal article supplement (doi:10.5194/gmd-2024-60), 2024-05-14
Supplement: Supplementary file 1 [file gmd-2024-60-supplement.pdf]

## Supplement to

# “Explaining neural networks for detection of tropical cyclones and atmospheric rivers in gridded atmospheric simulation data”

Tim Radke<sup>1</sup>, Susanne Fuchs<sup>1</sup>, Christian Wilms<sup>3</sup>, Iuliia Polkova<sup>2,4,5</sup>, and Marc Rautenhaus<sup>1,2</sup>

5 <sup>1</sup>Visual Data Analysis Group, Universität Hamburg, Hamburg, 20146, Germany

<sup>2</sup>Center for Earth System Research and Sustainability (CEN), Universität Hamburg, Hamburg, 20146, Germany

<sup>3</sup>Computer Vision Group, Universität Hamburg, Hamburg, 22527, Germany

<sup>4</sup>Institute of Oceanography, Universität Hamburg, Hamburg, 20146, Germany

<sup>5</sup> now at Deutscher Wetterdienst, Offenbach am Main, 63067, Germany

10

*Correspondence to:* Tim Radke (tim.radke@uni-hamburg.de)

### **S1 Results for CG-Net with alternative input value normalizations (“z-score+10” and “min-max”)**

As supplementary material to the main paper, we provide reproductions of Fig. 3 and 5 for CG-Net trained with the alternative input normalizations discussed in Sect. 6 of the paper (z-score shifted by +10 and min-max). For illustration of  
15 how normalization impacts the inputs, Fig. S1 in addition shows global distributions of all input variables, showing both variable values before and after z-score normalization.

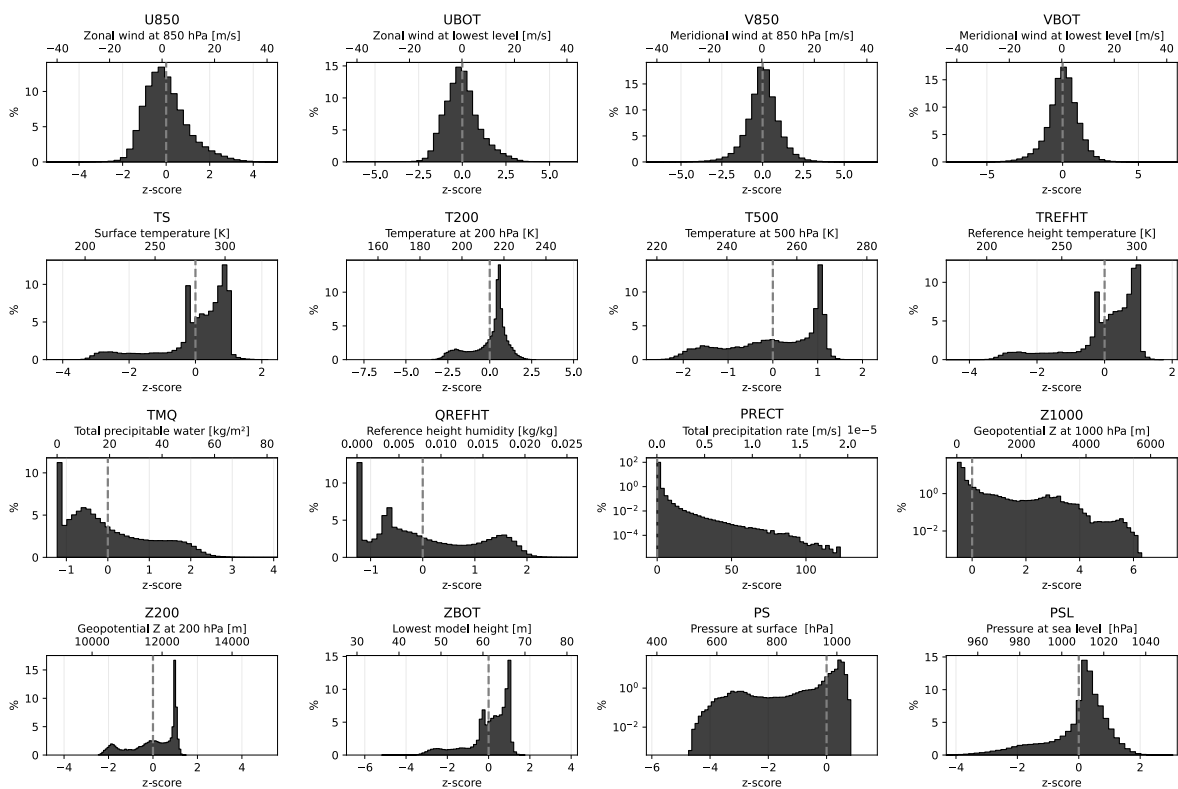

20

**Figure S1: Global distributions of variables values in the ClimateNet test dataset. Values in variable units are shown above each histogram, z-score normalized values below. The gray dashed lines indicate the zero value in the z-score normalized data.**

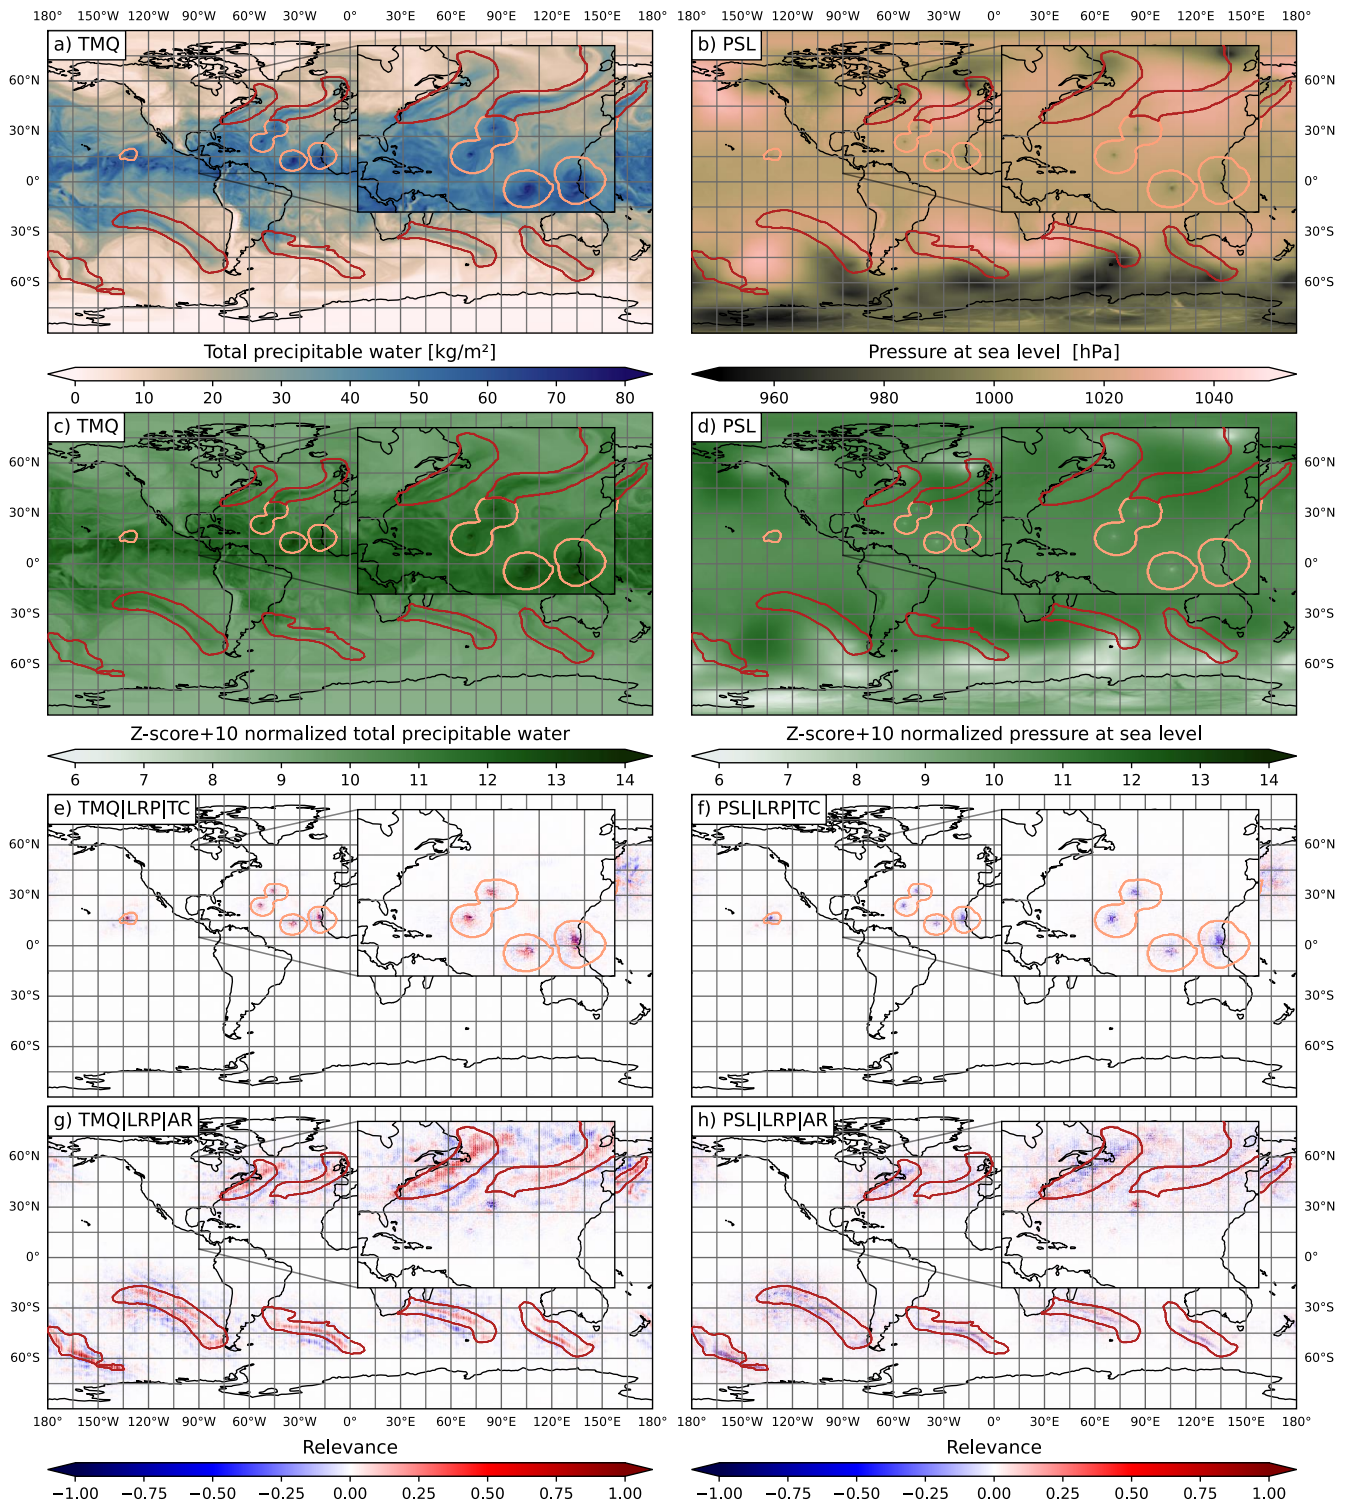

Figure S2: Same as Fig. 3 in the main paper but for CG-Net trained on “z-score+10”-normalized data.

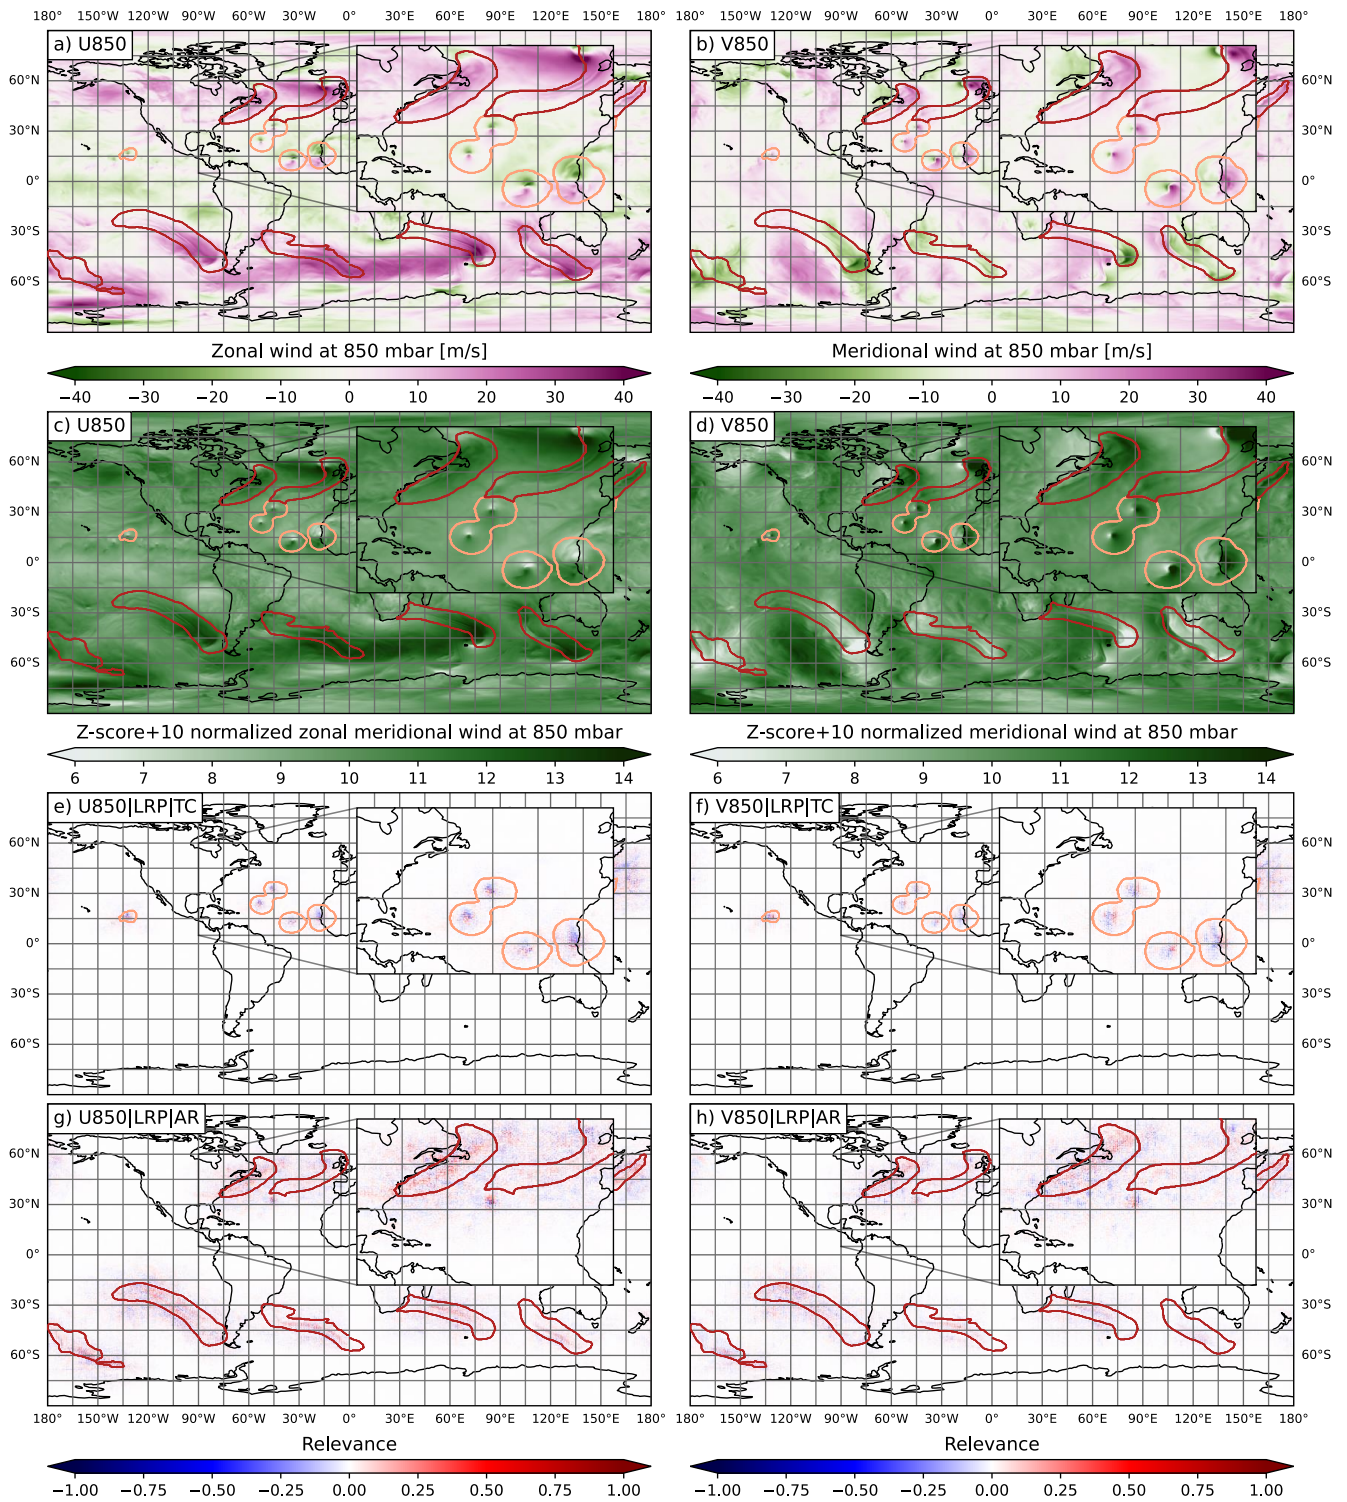

Figure S3: Same as Fig. 5 in the main paper but for CG-Net trained on "z-score+10"-normalized data.

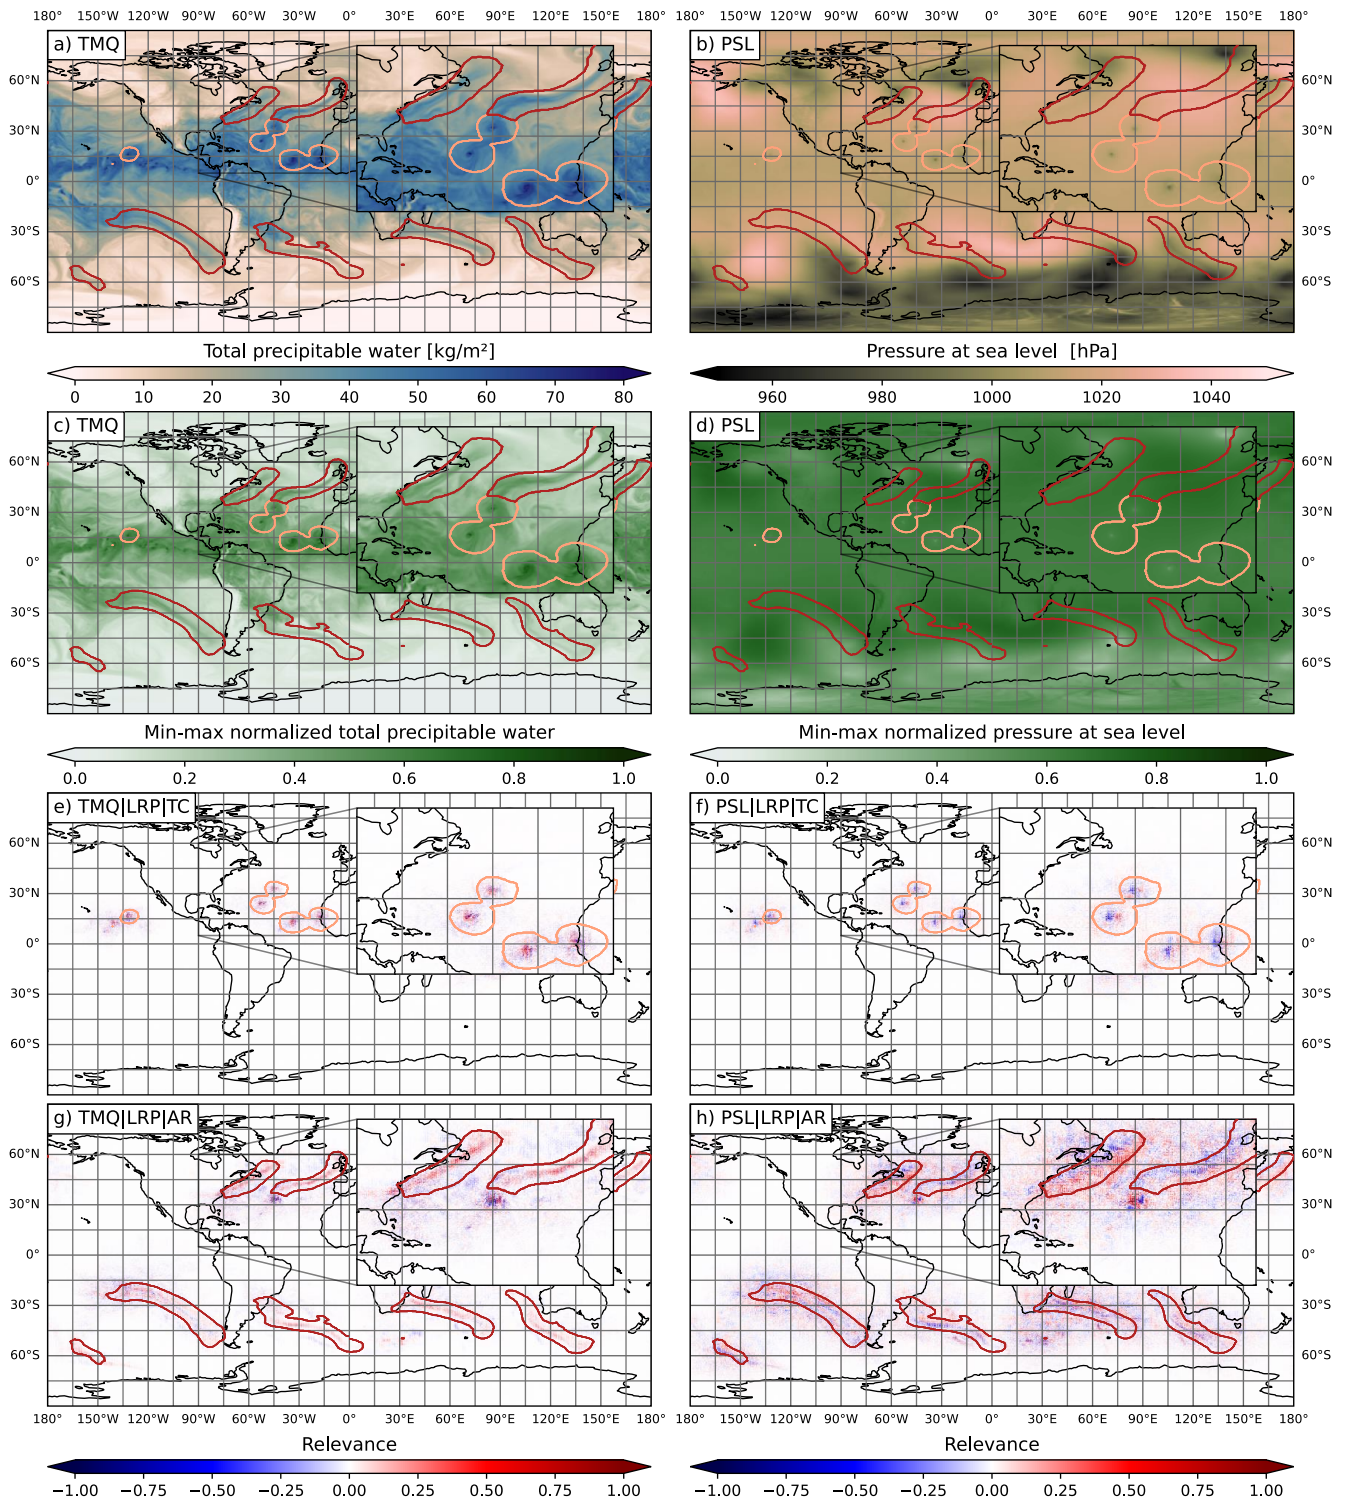

30 **Figure S4:** Same as Fig. 3 in the main paper but for CG-Net trained on "min-max"-normalized data.

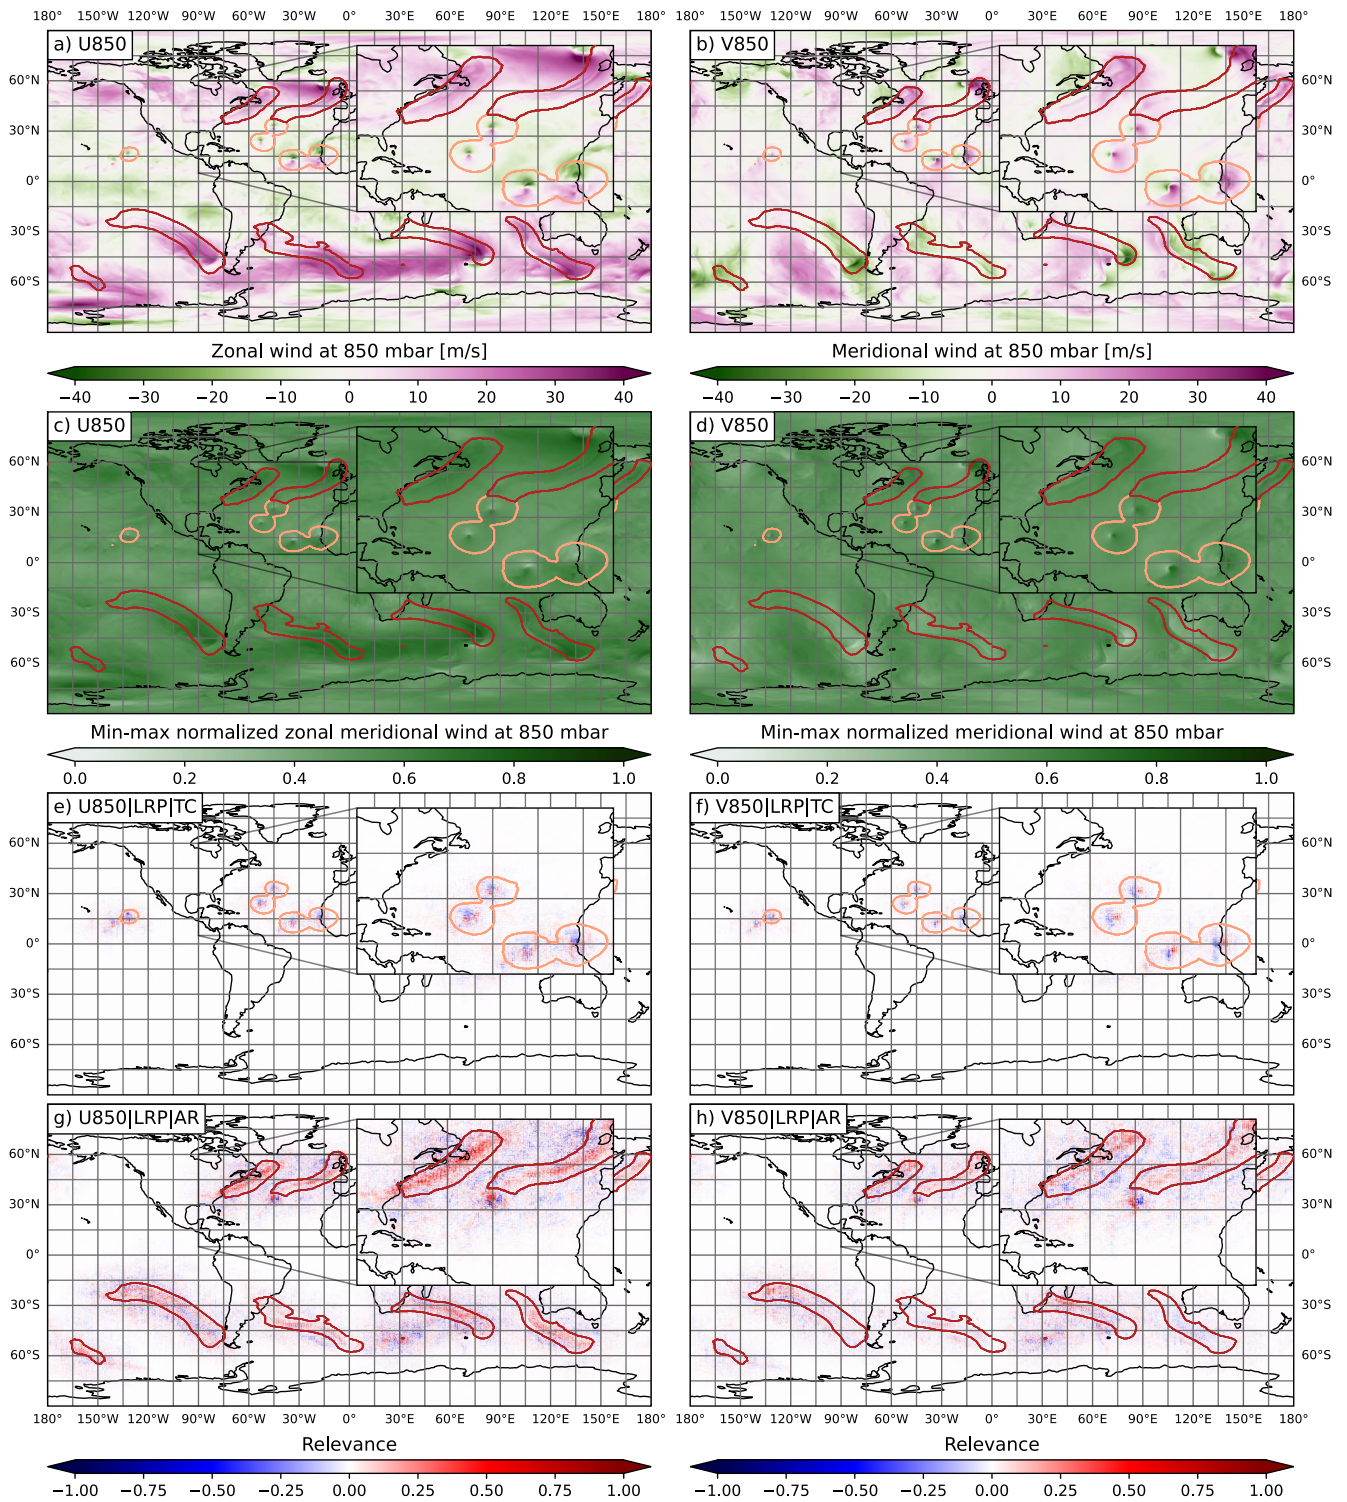

Figure S5: Same as Fig. 5 in the main paper but for CG-Net trained on "min-max"-normalized data.

## **S2 Results for the U-Net CNN architecture**

We provide reproductions of the major figures and tables of the main paper for using the U-Net architecture instead of the  
35 CG-Net architecture.

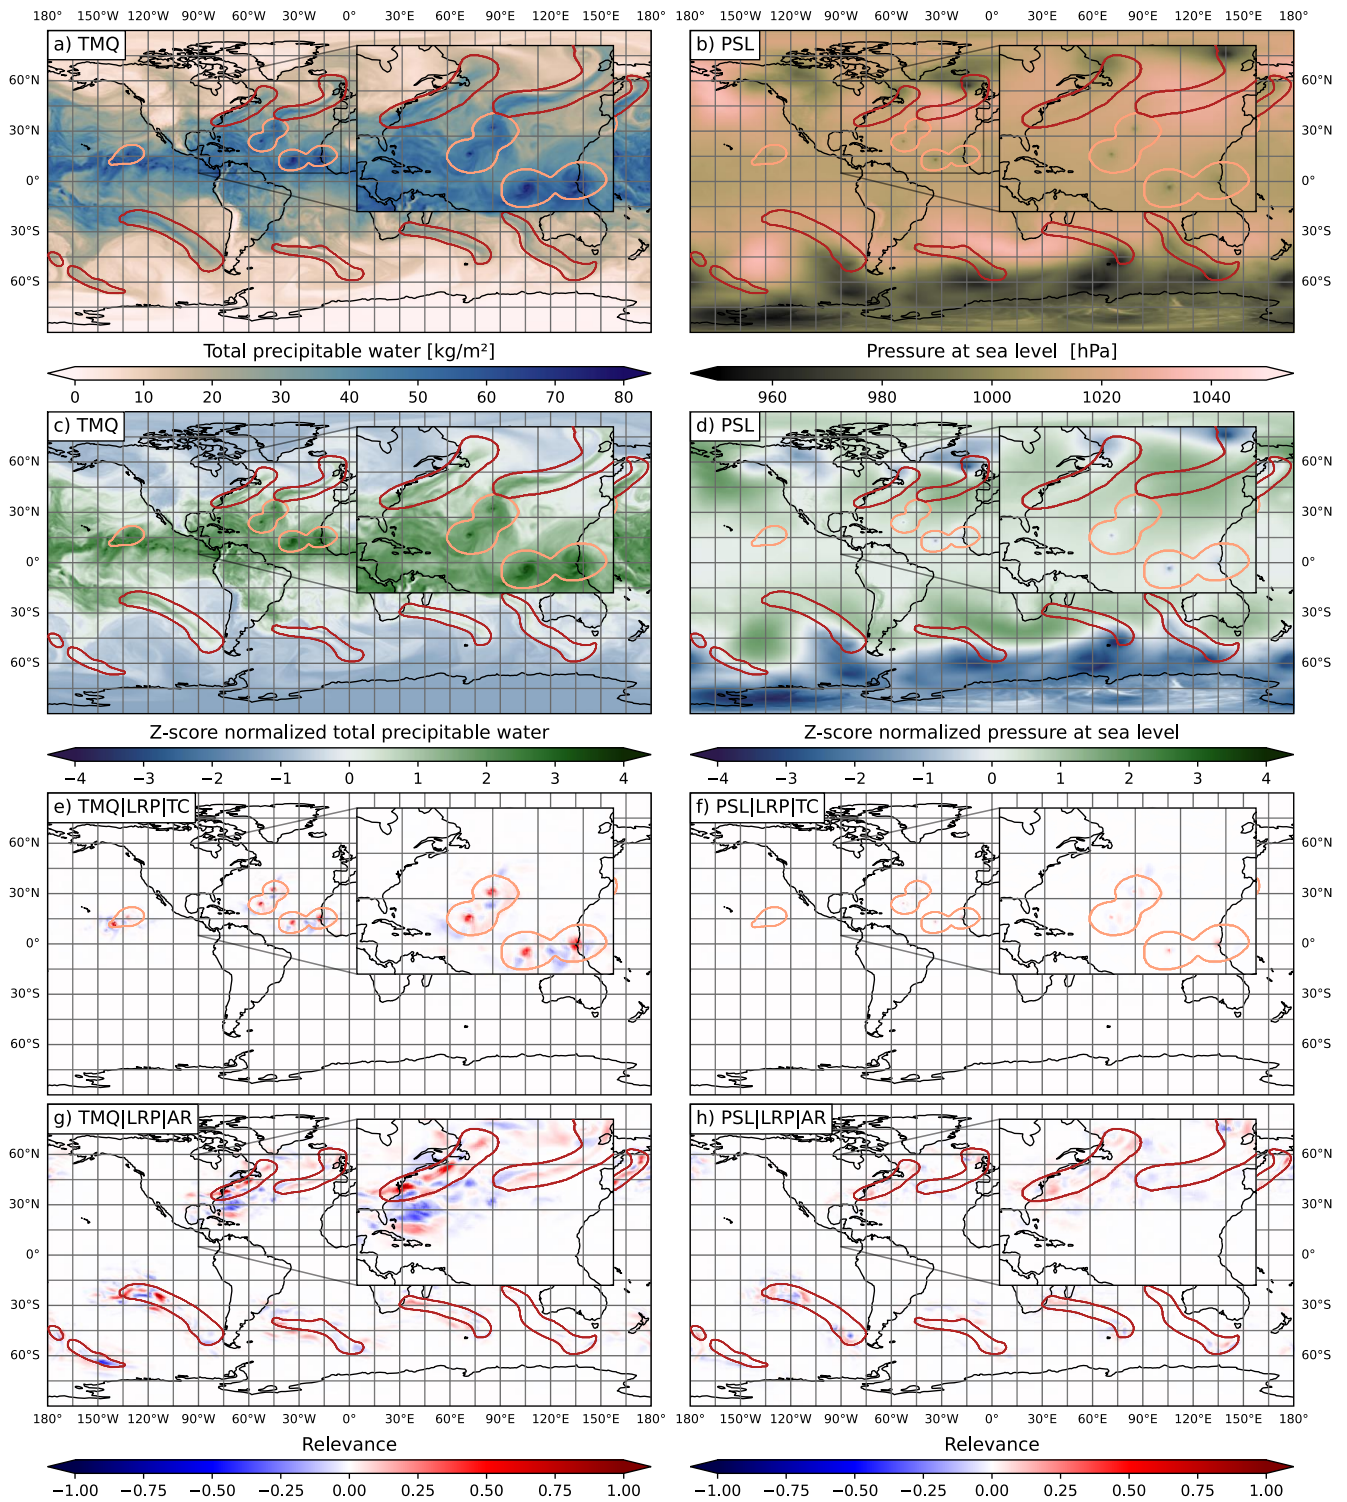

Figure S6: Same as Fig. 3 in the main paper but for U-Net trained on "z-score"-normalized data.



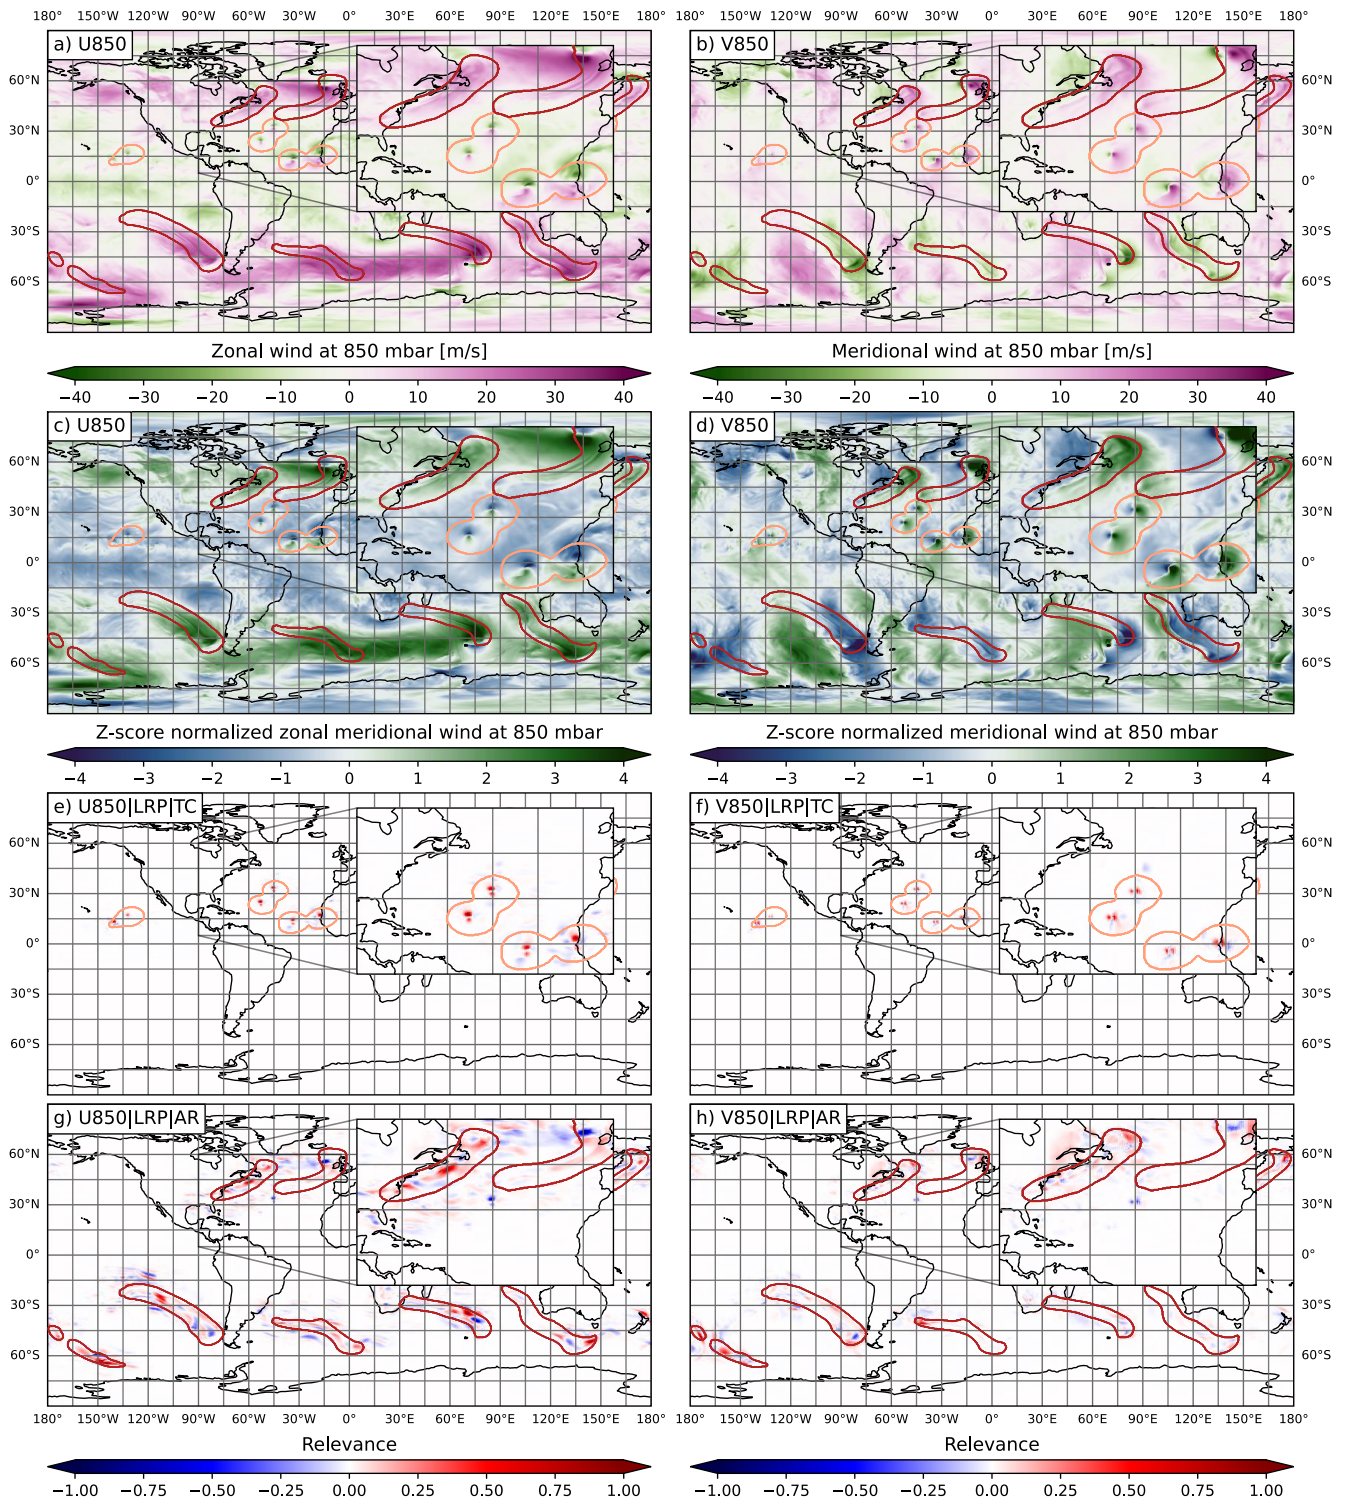

40 **Figure S7:** Same as Fig. 5 in the main paper but for U-Net trained on "z-score"-normalized data.

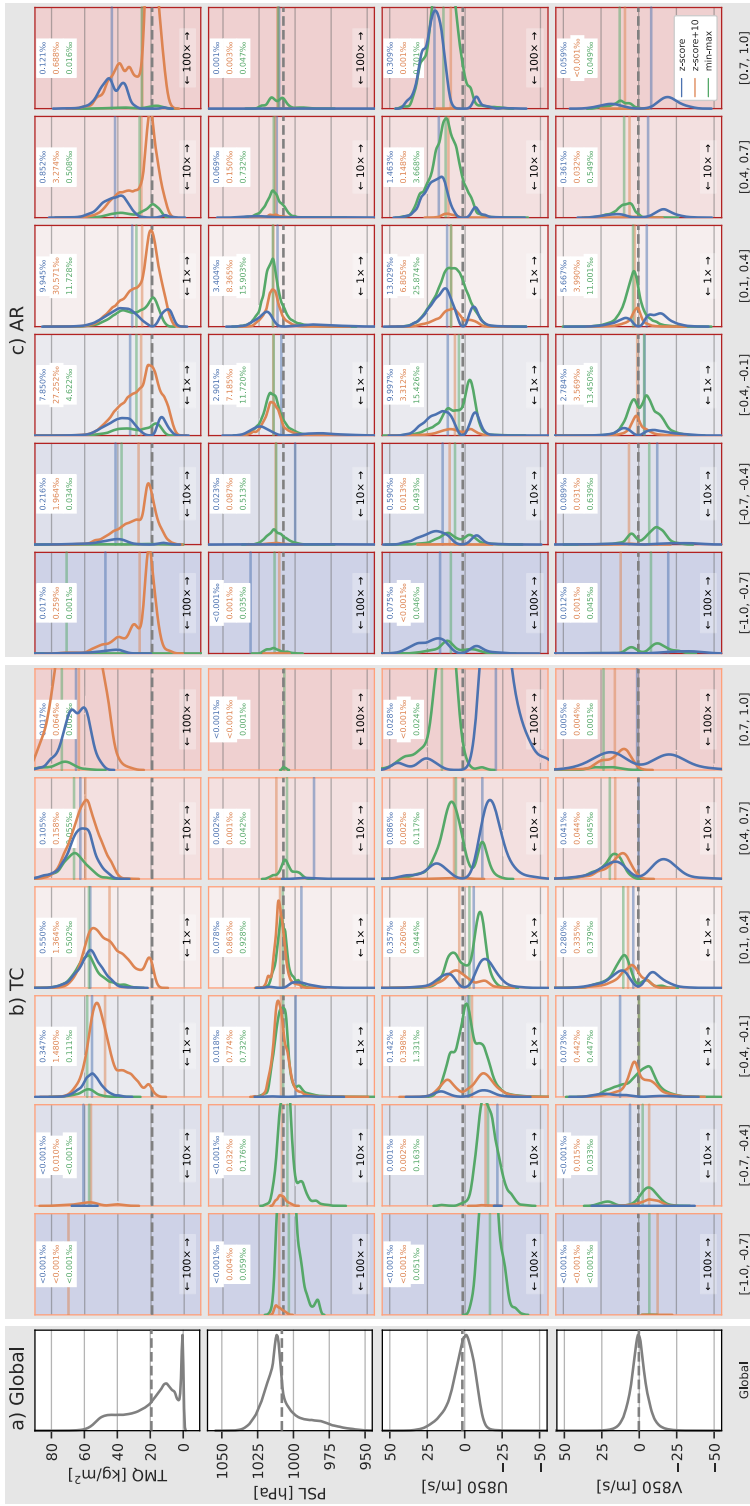

Figure S8: Same as Fig. 6 in the main paper but for U-Net.

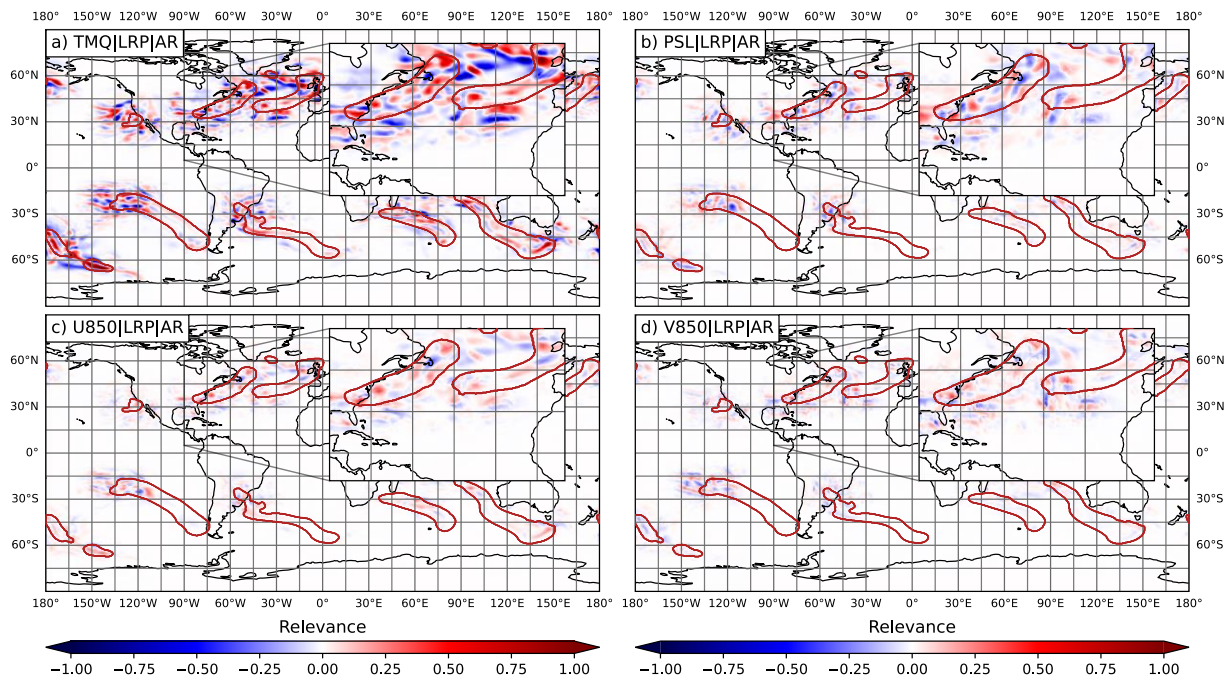

**Figure S9:** Same as Fig. 8 in the main paper but for U-Net trained on "z-score+10"-normalized data.

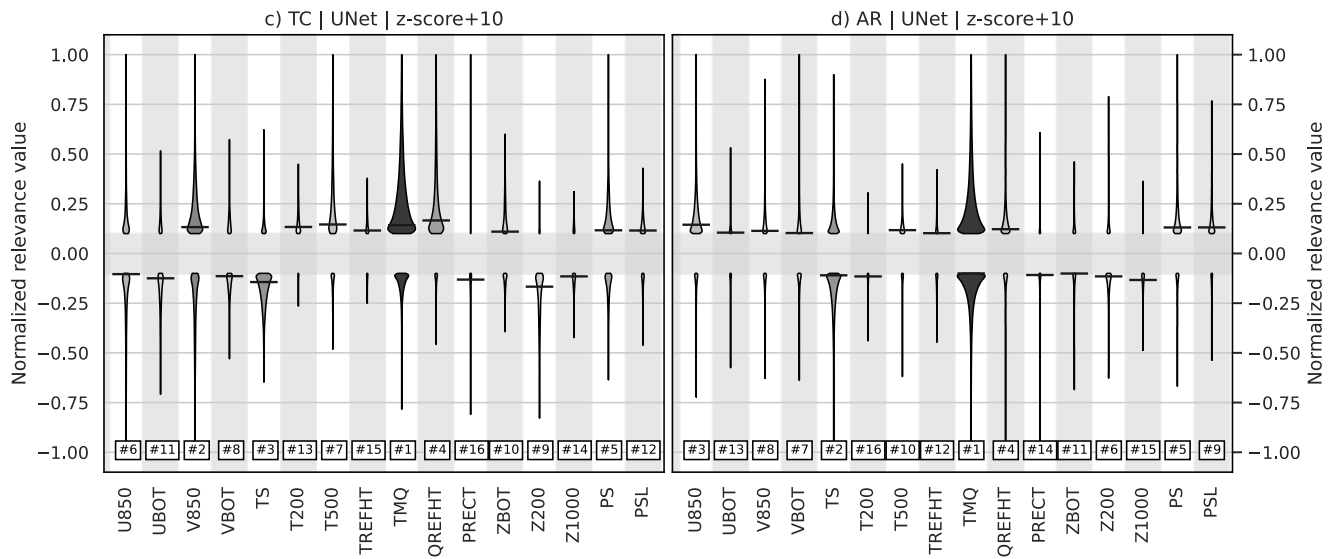

45

Figure S10: Same as Fig. 9 in the main paper but for U-Net.

Table S1: Same as Table 3 in the main paper but for U-Net. Note that compared to Table 3, different variable combinations are selected, following the ranking in Fig. S10.

| Data subset                        | AR          | TC          | AR-TC Mean  | Background  | AR-TC-BG Mean |
|------------------------------------|-------------|-------------|-------------|-------------|---------------|
| All 16 variables listed in Table 1 | <b>41.2</b> | <b>35.5</b> | <b>38.4</b> | <b>94.6</b> | <b>57.1</b>   |
| TMQ-TS-QREFHT-U850-V850            | 40.3        | 34.7        | 37.5        | 94.4        | 56.5          |
| TMQ-TS-U850-V850                   | 40.8        | 35.1        | 38.0        | 94.5        | 56.8          |
| TMQ-TS                             | 38.5        | 30.4        | 34.4        | 94.2        | 54.4          |
| TMQ                                | 38.9        | 31.9        | 35.4        | 94.2        | 55.0          |

50

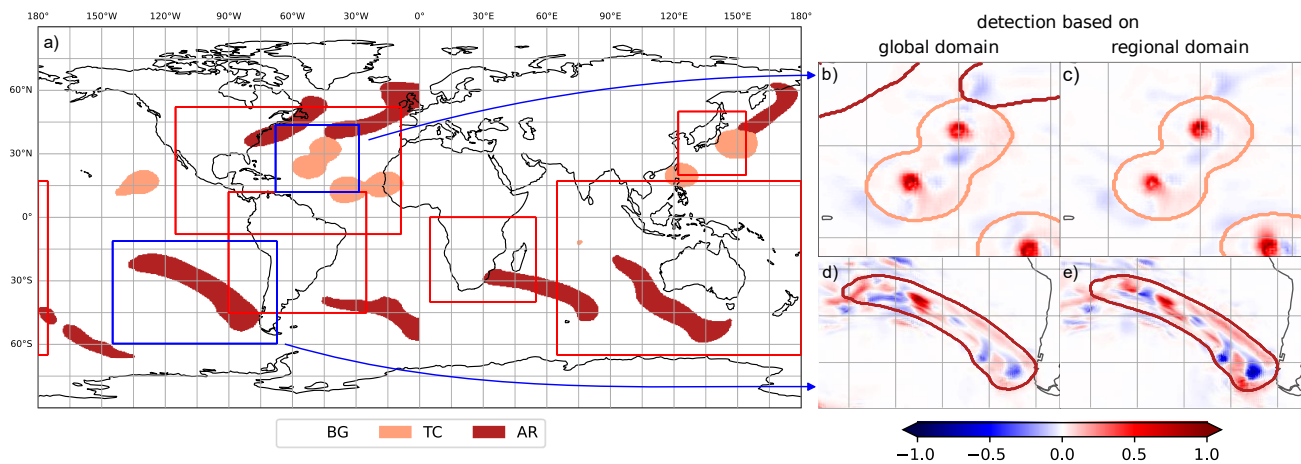

Figure S11: Same as Fig. 10 in the main paper but for U-Net.

55

Table S2: Same as Table 4 in the main paper but for U-Net.

| Region                      | (a) IoU of subregion<br>(detection using global data) |      |      | (b) IoU of subregion<br>(detection using regional data) |      |      |
|-----------------------------|-------------------------------------------------------|------|------|---------------------------------------------------------|------|------|
|                             | AR                                                    | TC   | BG   | AR                                                      | TC   | BG   |
| Global (same as in Table 2) | 40.1                                                  | 36.1 | 94.7 |                                                         |      |      |
| NOAA (North Atlantic)       | 34.4                                                  | 41.4 | 92.1 | 33.9                                                    | 39.9 | 92.1 |
| CPTEC (South America)       | 39.5                                                  | 40.2 | 92.9 | 31.5                                                    | 33.5 | 92.5 |
| SAWS (Southern Africa)      | 35.0                                                  | 19.6 | 91.3 | 8.1                                                     | 12.3 | 90.0 |
| JMA (Japan)                 | 31.3                                                  | 42.3 | 88.8 | 23.9                                                    | 42.4 | 89.2 |
| BoM (Oceania)               | 39.6                                                  | 11.6 | 92.1 | 37.2                                                    | 8.5  | 92.2 |
